# Supplementary material for: Combined Id1 and Id3 Deletion Leads to Severe Erythropoietic Disturbances
Source: PubMed Central journal article supplement (PMC4851361; doi:10.1371/journal.pone.0154480), 2016-04-29
Supplement: pone.0154480.s003.pdf [file pone.0154480.s003.pdf]

**S1 Table: List of identified proteins and their relative quantitation based on Spectra counting (sorted by T-test)**

| Identified Proteins (580)                                                       | Accession Number | Molecular Weight | Spectra counts (WT1) | Spectra counts (WT2) | Spectra counts (cKO63) | Spectra counts (cKO67) | Ratio (cKO/WT) | T-test |
|---------------------------------------------------------------------------------|------------------|------------------|----------------------|----------------------|------------------------|------------------------|----------------|--------|
| Glutamyl aminopeptidase OS=Mus musculus GN=Enpep                                | AMPE_MOUSE       | 108 kDa          | 1                    | 1                    | 0                      | 0                      | 0.5            | 0.00   |
| Neural cell adhesion molecule L1 OS=Mus musculus GN=L1CAM                       | L1CAM_MOUSE      | 141 kDa          | 1                    | 1                    | 0                      | 0                      | 0.5            | 0.00   |
| 60S ribosomal protein L22 OS=Mus musculus GN=Rpl22                              | RL22_MOUSE       | 15 kDa           | 1                    | 1                    | 0                      | 0                      | 0.5            | 0.00   |
| Rho GDP-dissociation inhibitor 1 OS=Mus musculus GN=RhoGDI1                     | GDIR1_MOUSE      | 23 kDa           | 1                    | 1                    | 0                      | 0                      | 0.5            | 0.00   |
| Bisphosphoglycerate mutase OS=Mus musculus GN=Bpgm                              | PMGE_MOUSE       | 30 kDa           | 1                    | 1                    | 0                      | 0                      | 0.5            | 0.00   |
| Sorbitol dehydrogenase OS=Mus musculus GN=Sord PE=1 SV=1                        | DHSO_MOUSE       | 38 kDa           | 1                    | 1                    | 0                      | 0                      | 0.5            | 0.00   |
| Pleckstrin OS=Mus musculus GN=Plek PE=1 SV=1                                    | PLEK_MOUSE       | 40 kDa           | 1                    | 1                    | 0                      | 0                      | 0.5            | 0.00   |
| Indian hedgehog protein OS=Mus musculus GN=Ihh PE=1 SV=1                        | IHH_MOUSE        | 45 kDa           | 1                    | 1                    | 0                      | 0                      | 0.5            | 0.00   |
| Tubulin beta-1 chain OS=Mus musculus GN=Tubb1 PE=1 SV=1                         | TBB1_MOUSE       | 50 kDa           | 1                    | 1                    | 0                      | 0                      | 0.5            | 0.00   |
| Corepressor interacting with RBPJ 1 OS=Mus musculus GN=Cir1                     | CIR1_MOUSE       | 52 kDa           | 1                    | 1                    | 0                      | 0                      | 0.5            | 0.00   |
| Uromodulin OS=Mus musculus GN=Umod PE=1 SV=1                                    | UROM_MOUSE       | 71 kDa           | 1                    | 1                    | 0                      | 0                      | 0.5            | 0.00   |
| Leucine-rich repeat neuronal protein 4 OS=Mus musculus GN=Lrrn4                 | LRRN4_MOUSE      | 80 kDa           | 1                    | 1                    | 0                      | 0                      | 0.5            | 0.00   |
| Keratin, type II cuticular Hb5 OS=Mus musculus GN=Krt8                          | KRT85_MOUSE      | 56 kDa           | 4                    | 4                    | 0                      | 0                      | 0.2            | 0.00   |
| Dipeptidyl peptidase 4 OS=Mus musculus GN=Dpp4 PE=1 SV=1                        | DPP4_MOUSE       | 87 kDa           | 2                    | 2                    | 0                      | 0                      | 0.3            | 0.00   |
| Ig kappa chain V-II region MOPC 167 OS=Mus musculus PE=1 SV=1                   | KV2A1_MOUSE      | 12 kDa           | 0                    | 0                    | 1                      | 1                      | 2.0            | 0.00   |
| Ig lambda-1 chain V region S178 OS=Mus musculus PE=1 SV=1                       | LV1C_MOUSE       | 12 kDa           | 0                    | 0                    | 1                      | 1                      | 2.0            | 0.00   |
| Ig heavy chain V region OS=Mus musculus PE=1 SV=1                               | HVM00_MOUSE      | 13 kDa           | 0                    | 0                    | 1                      | 1                      | 2.0            | 0.00   |
| Troponin T, cardiac muscle OS=Mus musculus GN=Tnnt2                             | TNNT2_MOUSE      | 36 kDa           | 0                    | 0                    | 1                      | 1                      | 2.0            | 0.00   |
| Dentin sialophosphoprotein OS=Mus musculus GN=Dspp                              | DSPP_MOUSE       | 94 kDa           | 0                    | 0                    | 1                      | 1                      | 2.0            | 0.00   |
| Apolipoprotein C-IV OS=Mus musculus GN=Apoc4 PE=1 SV=1                          | APOC4_MOUSE      | 14 kDa           | 2                    | 2                    | 1                      | 1                      | 0.7            | 0.00   |
| Insulin-like growth factor-binding protein 2 OS=Mus musculus GN=Igf2bp2         | IBP2_MOUSE       | 33 kDa           | 1                    | 1                    | 3                      | 3                      | 2.0            | 0.00   |
| Fibrinogen beta chain OS=Mus musculus GN=Fgb PE=1 SV=1                          | FIBB_MOUSE       | 55 kDa           | 55                   | 52                   | 79                     | 81                     | 1.5            | 0.01   |
| Ig heavy chain V regions TEPC 15/S107/HPCM1/HPCM2/HPCM3                         | HVM18_MOUSE (+4) | 14 kDa           | 1                    | 1                    | 2                      | 2                      | 1.5            | 0.01   |
| Ig kappa chain V-V region MOPC 173 OS=Mus musculus PE=1 SV=1                    | KV5AA_MOUSE      | 12 kDa           | 6                    | 6                    | 11                     | 12                     | 1.8            | 0.01   |
| H-2 class I histocompatibility antigen, D-K alpha chain OS=Mus musculus GN=Ha13 | HA13_MOUSE       | 41 kDa           | 3                    | 3                    | 2                      | 2                      | 0.7            | 0.01   |
| Coagulation factor X OS=Mus musculus GN=F10 PE=1 SV=1                           | FA10_MOUSE       | 54 kDa           | 24                   | 26                   | 14                     | 13                     | 0.6            | 0.01   |
| Prolow-density lipoprotein receptor-related protein 1 OS=Mus musculus GN=Lrp1   | LRP1_MOUSE       | 505 kDa          | 7                    | 7                    | 5                      | 5                      | 0.7            | 0.01   |
| Mannan-binding lectin serine protease 2 OS=Mus musculus GN=Mbsp2                | MASP2_MOUSE      | 76 kDa           | 14                   | 14                   | 9                      | 10                     | 0.7            | 0.01   |
| Keratin, type II cytoskeletal 2 epidermal OS=Mus musculus GN=Krt2               | K22E_MOUSE       | 71 kDa           | 12                   | 11                   | 9                      | 8                      | 0.7            | 0.01   |
| Ig kappa chain V-V region HP R16.7 OS=Mus musculus PE=1 SV=1                    | KV5AB_MOUSE (+1) | 12 kDa           | 9                    | 8                    | 17                     | 15                     | 1.8            | 0.02   |
| Ig gamma-1 chain C region, membrane-bound form OS=Mus musculus GN=IGH1M         | IGH1M_MOUSE (+1) | 43 kDa           | 54                   | 47                   | 20                     | 14                     | 0.4            | 0.02   |
| Ig kappa chain C region OS=Mus musculus PE=1 SV=1                               | IGKC_MOUSE       | 12 kDa           | 27                   | 31                   | 62                     | 54                     | 2.0            | 0.02   |

|                                                            |                  |         |     |     |    |    |     |      |
|------------------------------------------------------------|------------------|---------|-----|-----|----|----|-----|------|
| Phosphatidylinositol-glycan-specific phospholipase D OS=   | PHLD_MOUSE       | 93 kDa  | 50  | 53  | 43 | 42 | 0.8 | 0.02 |
| Immunoglobulin J chain OS=Mus musculus GN=Jchain PE=       | IGJ_MOUSE        | 18 kDa  | 10  | 7   | 18 | 17 | 1.9 | 0.02 |
| Ig heavy chain V region B1-8/186-2 OS=Mus musculus GN=     | HVM07_MOUSE (+1) | 15 kDa  | 5   | 4   | 2  | 2  | 0.5 | 0.03 |
| Fibulin-1 OS=Mus musculus GN=Fbln1 PE=1 SV=2               | FBLN1_MOUSE      | 78 kDa  | 6   | 6   | 10 | 9  | 1.5 | 0.03 |
| Apolipoprotein E OS=Mus musculus GN=ApoE PE=1 SV=2         | APOE_MOUSE       | 36 kDa  | 53  | 60  | 34 | 38 | 0.6 | 0.03 |
| Adiponectin OS=Mus musculus GN=Adipoq PE=1 SV=2            | ADIPO_MOUSE      | 27 kDa  | 5   | 5   | 7  | 6  | 1.2 | 0.04 |
| H-2 class I histocompatibility antigen, Q8 alpha chain OS= | HA18_MOUSE       | 37 kDa  | 8   | 7   | 6  | 5  | 0.7 | 0.04 |
| Ig lambda-3 chain C region OS=Mus musculus GN=Iglc3 P      | LAC3_MOUSE       | 11 kDa  | 4   | 4   | 5  | 5  | 1.2 | 0.05 |
| Thrombospondin-4 OS=Mus musculus GN=Thbs4 PE=1 SV=         | TSP4_MOUSE       | 106 kDa | 4   | 4   | 6  | 5  | 1.3 | 0.05 |
| Major urinary protein 3 OS=Mus musculus GN=Mup3 PE=        | MUP3_MOUSE       | 21 kDa  | 8   | 7   | 3  | 0  | 0.3 | 0.05 |
| Ig mu chain C region OS=Mus musculus GN=Ighm PE=1 SV=      | IGHM_MOUSE       | 50 kDa  | 128 | 160 | 74 | 81 | 0.5 | 0.05 |
