# Supplementary material for: Combined Id1 and Id3 Deletion Leads to Severe Erythropoietic Disturbances
Source: PubMed Central journal article supplement (PMC4851361; doi:10.1371/journal.pone.0154480), 2016-04-29
Supplement: pone.0154480.s004.pdf [file pone.0154480.s004.pdf]

S2 Table. Pathway analysis of complex 'omics data for Id cDKO bone marrow cells.

## Top Diseases and Bio Functions

### Diseases and Disorders

| Name                  | p-value             | # Molecules |
|-----------------------|---------------------|-------------|
| Infectious Disease    | 1.08E-21 - 1.00E-03 | 308         |
| Hematological Disease | 9.71E-19 - 8.68E-04 | 214         |
| Immunological Disease | 9.71E-19 - 7.42E-04 | 278         |
| Inflammatory Disease  | 9.71E-19 - 4.93E-04 | 236         |
| Inflammatory Response | 9.71E-19 - 1.28E-03 | 236         |

### Molecular and Cellular Functions

| Name                                  | p-value             | # Molecules |
|---------------------------------------|---------------------|-------------|
| Cell Death                            | 4.88E-29 - 1.19E-03 | 557         |
| RNA Post-Transcriptional Modification | 1.66E-23 - 8.67E-04 | 93          |
| Protein Synthesis                     | 1.01E-22 - 8.67E-04 | 252         |
| Cellular Growth and Proliferation     | 1.39E-19 - 9.01E-04 | 510         |
| Nucleic Acid Metabolism               | 7.66E-19 - 1.04E-03 | 163         |

### Physiological System Development and Function

| Name                                          | p-value             | # Molecules |
|-----------------------------------------------|---------------------|-------------|
| Immune Cell Trafficking                       | 2.24E-11 - 1.07E-03 | 158         |
| Hematological System Development and Function | 9.03E-11 - 1.19E-03 | 235         |
| Organismal Survival                           | 3.68E-08 - 1.02E-03 | 231         |
| Embryonic Development                         | 8.91E-07 - 1.02E-03 | 85          |
| Endocrine System Development and Function     | 1.51E-06 - 1.51E-06 | 7           |

### Top Canonical Pathways

| Name                                    | p-value  | Ratio          |
|-----------------------------------------|----------|----------------|
| EIF2 Signaling                          | 3.40E-35 | 80/202 (0.396) |
| Regulation of eIF4 and p70S6K Signaling | 1.11E-22 | 57/174 (0.328) |
| Protein Ubiquitination Pathway          | 3.37E-22 | 77/268 (0.287) |
| Mitochondrial Dysfunction               | 4.89E-17 | 47/174 (0.27)  |
| mTOR Signaling                          | 4.46E-16 | 56/209 (0.268) |

### Top Molecules

### Fold Change up-regulated

| Molecules | Exp. Value | Exp. Chart |
|-----------|------------|------------|
| FES       | 13.150     |            |
| GPR98D    | 13.070     |            |
| PGRMC1    | 8.340      |            |
| CPSF1     | 7.890      |            |
| LASP1     | 6.720      |            |
| PRMT5     | 6.620      |            |
| ATXN3     | 6.560      |            |
| IGHM      | 5.650      |            |
| Ugt1a7c   | 4.710      |            |
| Egln1D    | 4.630      |            |

### Fold Change down-regulated

| Molecules | Exp. Value | Exp. Chart |
|-----------|------------|------------|
| COPE      | -3.571     |            |
| ASAH1     | -3.448     |            |
| FTL       | -3.030     |            |
| HBB       | -2.778     |            |
| MEF2D     | -2.381     |            |
| CDC42     | -2.273     |            |
| CTSD      | -2.174     |            |
| ACP5D     | -2.174     |            |
| MPP1      | -2.128     |            |
| HMGCL     | -2.041     |            |

### Top Upstream Regulators

| Upstream Regulator | p-value of overlap | Predicted Activation State |
|--------------------|--------------------|----------------------------|
| MYC                | 1.15E-36           |                            |
| MYCN               | 1.73E-23           |                            |
| NFE2L2             | 8.07E-19           |                            |
| E2F1               | 3.29E-08           |                            |
| XBP1               | 4.00E-08           |                            |

### Top Tox Lists

| Name                                              | p-value  | Ratio          |
|---------------------------------------------------|----------|----------------|
| Mitochondrial Dysfunction                         | 1.35E-16 | 47/136 (0.346) |
| Oxidative Stress                                  | 7.08E-06 | 17/57 (0.298)  |
| NRF2-mediated Oxidative Stress Response           | 4.81E-05 | 40/231 (0.173) |
| Cardiac Necrosis/Cell Death                       | 2.22E-04 | 33/191 (0.173) |
| Cell Cycle: G2/M DNA Damage Checkpoint Regulation | 9.32E-04 | 12/48 (0.25)   |

## Top Tox Functions

### Assays: Clinical Chemistry and Hematology

| Name                           | p-value             | # Molecules |
|--------------------------------|---------------------|-------------|
| Increased Levels of Hematocrit | 1.97E-02 - 1.97E-02 | 15          |
| Increased Levels of LDH        | 2.47E-02 - 2.47E-02 | 4           |
| Increased Levels of Albumin    | 9.06E-02 - 1.73E-01 | 2           |
| Decreased Levels of Albumin    | 9.63E-02 - 6.48E-01 | 5           |
| Increased Levels of Bilirubin  | 1.73E-01 - 1.73E-01 | 1           |

### Cardiotoxicity

| Name                        | p-value             | # Molecules |
|-----------------------------|---------------------|-------------|
| Cardiac Necrosis/Cell Death | 7.09E-04 - 3.16E-01 | 33          |
| Cardiac Fibrosis            | 8.67E-04 - 5.32E-01 | 22          |
| Cardiac Inflammation        | 2.77E-03 - 4.35E-01 | 10          |
| Cardiac Damage              | 6.45E-03 - 5.32E-01 | 9           |
| Cardiac Dilation            | 2.16E-02 - 5.24E-01 | 11          |

### Hepatotoxicity

| Name                                 | p-value             | # Molecules |
|--------------------------------------|---------------------|-------------|
| Hepatocellular Carcinoma             | 3.85E-05 - 2.14E-01 | 75          |
| Liver Hyperplasia/Hyperproliferation | 3.85E-05 - 2.14E-01 | 76          |
| Liver Damage                         | 1.51E-02 - 3.78E-01 | 22          |
| Liver Hepatitis                      | 2.94E-02 - 1.00E00  | 11          |
| Liver Hypoplasia                     | 7.32E-02 - 7.32E-02 | 7           |

### Nephrotoxicity

| Name | p-value | # Molecules |
|------|---------|-------------|
|------|---------|-------------|

|                     |                     |    |
|---------------------|---------------------|----|
| Renal Tubule Injury | 6.45E-06 - 3.32E-01 | 28 |
| Renal Inflammation  | 8.20E-03 - 1.00E00  | 22 |
| Renal Nephritis     | 8.20E-03 - 1.00E00  | 22 |
| Kidney Failure      | 2.16E-02 - 5.36E-01 | 19 |
| Renal Damage        | 5.15E-02 - 4.33E-01 | 13 |
